# Supplementary material for: Trends in Pediatric Complicated Pneumonia in an Ontario Local Health Integration Network
Source: MDPI journal article supplement (doi:10.3390/children5030036), 2018-03-03
Supplement: s1 [file s1]

**Figure S1.** Admissions for pediatric complicated pneumonia (PCOMP) (all ages) for children living in Western Quebec, by year.

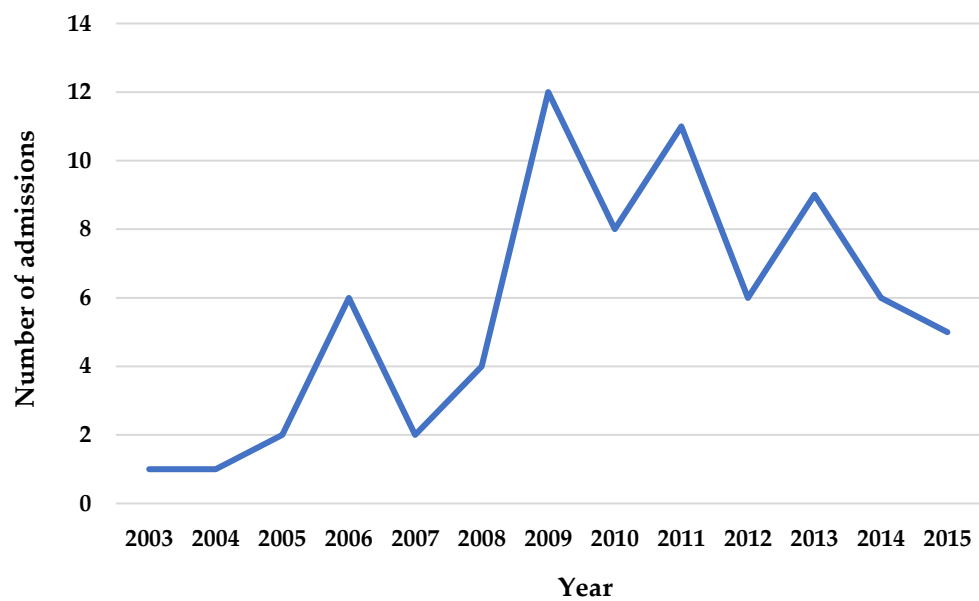

**Supplementary Table S1.** International Statistical Classification of Diseases and Related Health Problems (ICD) codes used to identify patients with parapneumonic effusion, empyema, necrotizing pneumonia, and/or lung abscess.

| Diagnosis Code | Description                                                           |
|----------------|-----------------------------------------------------------------------|
| J10.0          | Influenza with pneumonia, other influenza virus identified            |
| J11.0          | Influenza with pneumonia, virus not identified                        |
| J11.1          | Influenza with other respiratory manifestations, virus not identified |
| J12.0          | Adenoviral pneumonia                                                  |
| J12.1          | Respiratory syncytial virus pneumonia                                 |
| J12.2          | Parainfluenza virus pneumonia                                         |
| J12.3          | Human metapneumovirus pneumonia*                                      |
| J12.8          | Other viral pneumonia                                                 |
| J12.9          | Viral pneumonia, unspecified                                          |
| J13            | Pneumonia due to <i>Streptococcus pneumoniae</i>                      |
| J14            | Pneumonia due to <i>Haemophilus influenzae</i>                        |
| J15.0          | Pneumonia due to <i>Klebsiella pneumoniae</i>                         |
| J15.1          | Pneumonia due to <i>Pseudomonas</i>                                   |
| J15.2          | Pneumonia due to <i>Staphylococcus</i>                                |
| J15.4          | Pneumonia due to other streptococci                                   |
| J15.5          | Pneumonia due to <i>Escherichia coli</i>                              |
| J15.6          | Pneumonia due to other Gram-negative bacteria                         |
| J15.7          | Pneumonia due to <i>Mycoplasma pneumoniae</i>                         |
| J15.8          | Other bacterial pneumonia                                             |
| J15.9          | Bacterial pneumonia, unspecified                                      |
| J17.0          | Pneumonia in bacterial diseases classified elsewhere                  |
| J17.1          | Pneumonia in viral diseases classified elsewhere                      |
| J17.2          | Pneumonia in mycoses                                                  |
| J18.0          | Bronchopneumonia, unspecified                                         |
| J18.1          | Lobar pneumonia, unspecified                                          |
| J18.9          | Pneumonia, unspecified                                                |
| J85.0          | Gangrene and necrosis of lung                                         |
| J85.1          | Abscess of lung with pneumonia                                        |
| J85.2          | Abscess of lung without pneumonia                                     |
| J85.3          | Abscess of mediastinum                                                |
| J86.0          | Pyothorax with fistula                                                |
| J86.9          | Pyothorax without fistula                                             |
| J90            | Pleural effusion, not elsewhere classified                            |
| J91            | Pleural effusion in conditions classified elsewhere                   |
| J94.0          | Chylous effusion                                                      |

\*This code was introduced in 2009.
